# Supplementary material
Source: ML conference proceedings conference paper supplement (https://proceedings.neurips.cc/paper_files/paper/2023/hash/7d866abba506e5a56335e4644ebe18f9-Abstract.html)

---

# AR-DIFFUSION: Auto-Regressive Diffusion Model for Text Generation

---

Anonymous Author(s)

Affiliation

Address

email

## Abstract

1        Diffusion models have gained significant attention in the realm of image generation  
2        due to their exceptional performance. Their success has been recently expanded  
3        to text generation via generating all tokens within a sequence concurrently. How-  
4        ever, natural language exhibits a far more pronounced sequential dependency in  
5        comparison to images, and the majority of existing language models are trained  
6        with a left-to-right auto-regressive approach. To account for the inherent sequen-  
7        tial characteristic of natural language, we introduce Auto-Regressive Diffusion  
8        (AR-DIFFUSION). AR-DIFFUSION ensures that the generation of tokens on the  
9        right depends on the generated ones on the left, a mechanism achieved through  
10        employing a dynamic number of denoising steps that vary based on token position.  
11        This results in tokens on the left undergoing fewer denoising steps than those on  
12        the right, thereby enabling them to generate earlier and subsequently influence  
13        the generation of tokens on the right. In a series of experiments on various text  
14        generation tasks, including text summarization, machine translation, and common  
15        sense generation, AR-DIFFUSION clearly demonstrated its superiority over existing  
16        diffusion language models and that it can be  $100\times \sim 600\times$  faster when achieving  
17        comparable results. Our code will be publicly available.

## 18    1 Introduction

19    Text generation is a fundamental task within the field of natural language processing (NLP). Pre-  
20    trained language models like GPT-4 [OpenAI, 2023], LLaMA [Touvron et al., 2023], and Alpaca  
21    [Taori et al., 2023] have garnered significant attention with their ability to generate fluent and human-  
22    like textual content. These models utilize the auto-regressive (AR) Transformer decoders [Vaswani  
23    et al., 2017] to emit generated tokens one-by-one in sequential order from left to right. By leveraging  
24    the power of position dependency, AR models are able to enhance the naturalness, coherence, and  
25    adherence to human language conventions in the generated text [Brown et al., 2020].

26    Recent studies have shown the remarkable performance of diffusion models in image generation [Ho  
27    et al., 2020], motivating researchers to extend diffusion to text generation [Li et al., 2022a, Gong  
28    et al., 2022, Dieleman et al., 2022, Yuan et al., 2022, Ye et al., 2023]. By introducing timestep, these  
29    methods progressively regulate the interpolation between the original tokens and Gaussian noise, then  
30    iteratively denoise for text generation. At each timestep, the diffusion-based text generator predicts  
31    all tokens simultaneously following Non-Auto-Regression (NAR) [Lewis et al., 2020, Qi et al., 2020,  
32    2021, Li et al., 2022b], leading to faster decoding speed compared to AR. However, it also inherits  
33    the drawback of NAR, namely the sacrifice of inter-token position dependency [Li et al., 2022c] and  
34    the drop of generation performance [Bao et al., 2021].

35    To conduct a comprehensive analysis, we introduce a two-dimensional coordinate system to track the  
36    diffusion timestep of tokens  $f(\cdot)$  positioned at various locations. As illustrated in Figure 1, the system

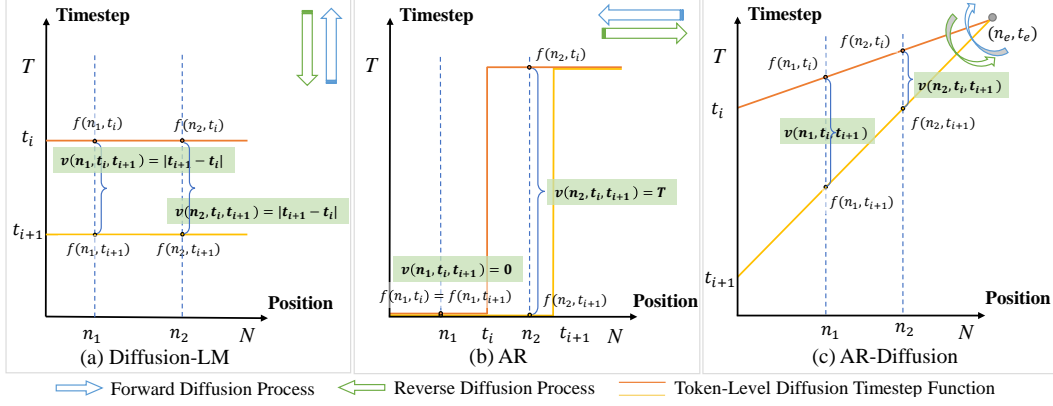

Figure 1: Model behaviors illustrated on a two-dimensional coordinate system, where the horizontal axis stands for the position and the vertical axis represents the diffusion timestep. In the inference stage, different models will behave differently. (a) For the typical Diffusion-LM [Li et al., 2022a], each token share the identical movement speed  $v(n_1, t_i, t_{i+1}) = v(n_2, t_i, t_{i+1}) = |t_{i+1} - t_i|$ . (b) For AR from the perspective of diffusion models, the tokens have two states based on the degree of interpolation between the original tokens and Gaussian noise: to be decoded (at timestep  $t = T$ ) and already decoded (at timestep  $t = 0$ ). Specifically, we have  $v(n_1, t_i, t_{i+1}) = 0$  and  $v(n_2, t_i, t_{i+1}) = T$ . (c) In AR-DIFFUSION,  $(n_e, t_e)$  is the coordinate of anchor point. Tokens in different positions exhibit varying movement speeds, such as  $v(n_1, t_i, t_{i+1}) > v(n_2, t_i, t_{i+1})$  when  $n_1 < n_2$ .

37 assigns the token position  $n \in [1, N]$  to the horizontal axis and the diffusion timestep  $t \in [0, T]$  to  
 38 the vertical axis. Diffusion-LM [Li et al., 2022a], which is followed by existing diffusion-based text  
 39 generation models, is shown in Figure 1(a). It assigns a uniform timestep  $t$  to all tokens. In contrast,  
 40 tokens in the AR model depicted in Figure 1(b) exhibit distinct timesteps within a generation step ( $t_i$ ).  
 41 For instance, the already decoded token at position  $n_1$  has a timestep of 0, while the to-be-decoded  
 42 token at position  $n_2$  has a timestep of  $T$ . This approach effectively captures the sequential dependency.  
 43 Motivated by this observation, we introduce AR-DIFFUSION, an auto-regressive diffusion method,  
 44 for the disparity in token positions and the principle of sequential token identification.

45 In AR-DIFFUSION, we propose a **multi-level diffusion strategy** that includes both sentence-level  
 46 and token-level diffusion. We randomly choose a sentence-level timestep  $t$ , and assign **dynamic**  
 47 **movement speeds**  $v(\cdot)$  by determining position-sensitive token-level timestep  $f(n, t)$  for each token.  
 48 This enables tokens at the left of a sentence to undergo faster movement from random Gaussian noise  
 49 to token embedding, while those at the right of the sentence experience slower movement to better  
 50 utilize information from previously denoised tokens. During inference, to reduce the significant  
 51 number of inference steps (e.g., 2,000) required in Diffusion-LM [Li et al., 2022a], SeqDiffSeq [Yuan  
 52 et al., 2022] and GENIE [Lin et al., 2023], we introduce a skipping mechanism that collaborates with  
 53 the multi-level diffusion strategy to accelerate the process.

54 Experimental results across various text generation tasks, such as text summarization, machine  
 55 translation, and common sense generation, have consistently demonstrated that AR-DIFFUSION  
 56 surpasses existing text diffusion models, including AR methods in terms of both quality and diversity.  
 57 Moreover, our verification reveals that AR-DIFFUSION requires fewer resources during decoding  
 58 while maintaining superior performance. It achieves  $100\times$  faster than SeqDiffSeq [Yuan et al., 2022]  
 59 in machine translation and  $600\times$  faster than GENIE [Lin et al., 2023] in text summarization while  
 60 delivering comparable results. Furthermore, it demonstrates promising results even in a challenging  
 61 scenario where decoding is limited to only two steps.

## 62 2 Preliminary

### 63 2.1 Conditional Generative Language Models

64 In the field of natural language generation, conditional generative models are commonly implemented  
 65 using either auto-regressive (AR) or non-auto-regressive (NAR) methods. In AR [Vaswani et al.,

2017], tokens on the right are predicted based on visible left tokens. The likelihood is given by  $p_{\text{AR}}(\mathbf{y}|\mathbf{x}) = \prod_{i=1}^N p(\mathbf{y}_i|\mathbf{y}_{1:i-1}; \mathbf{x})$ , where  $y_i$  denotes the  $i$ -th token of  $\mathbf{y}$ . On the other hand, NAR [Gu et al., 2017] assumes conditional independence among tokens and generates them uniformly without distinction during decoding, resulting in the likelihood  $p_{\text{NAR}}(\mathbf{y}|\mathbf{x}) = \prod_{i=1}^N p(\mathbf{y}_i|\mathbf{x})$ . This parallel generation approach is of lower quality compared to AR, although it offers a substantial speed advantage.

## 2.2 Diffusion Models for Text Generation

Recently, Li et al. [2022a] propose a natural language generation model based on the diffusion process, which is typically divided into a forward noising process and a reverse denoising process.

Specifically, the forward process is a fixed linear Gaussian model, which gradually perturbs the random variable  $\mathbf{z}_0$  until it becomes the standard Gaussian distribution. This can be formalized as:

$$q(\mathbf{z}_t | \mathbf{z}_0; \mathbf{x}) = \mathcal{N}(\mathbf{z}_t; \sqrt{\bar{\alpha}_t} \mathbf{z}_0, (1 - \bar{\alpha}_t) \mathbf{I}), \quad (1)$$

where,  $\bar{\alpha}_t = \prod_{i=1}^t \alpha_i$ , and  $\alpha_i$  is a coefficient that monotonically decreases with timestep  $t$ ,  $\mathbf{z}_t$  is the latent state at timestep  $t$ .

The reverse process is to initiate from standard Gaussian noise and progressively utilize the denoising transition  $p_{\theta}(\mathbf{z}_{t-1}|\mathbf{z}_t; \mathbf{x})$  for generation.

$$p_{\theta}(\mathbf{z}_{t-1} | \mathbf{z}_t; \mathbf{x}) = \mathcal{N}(\mathbf{z}_{t-1}; \mu_{\theta}(\mathbf{z}_t, t; \mathbf{x}), \Sigma_{\theta}(\mathbf{z}_t, t; \mathbf{x})), \quad (2)$$

where the mean  $\mu_{\theta}$  and variance  $\Sigma_{\theta}$  are learned from the model. In particular, we follow Li et al. [2022a]’s approach of using predefined variance without trainable parameters.

To extend the continuous diffusion process to discrete text generation, Li et al. [2022a] introduce an additional Markov transition from the discrete tokens  $\mathbf{y}$  to the latent variable  $\mathbf{z}_0$ . In practice, we add an embedding step  $q_{\phi}(\mathbf{z}_0|\mathbf{y}) = \mathcal{N}(\mathbf{z}_0; \text{Emb}(\mathbf{y}), (1 - \alpha_0) \mathbf{I})$  in the forward process, and use a trainable rounding step which is parametrized by  $p_{\theta}(\mathbf{y}|\mathbf{z}_0; \mathbf{x}) = \prod_{i=1}^N p_{\theta}(y_i|z_0^i; \mathbf{x})$  in the reverse process. In each timestep, we utilize an encoder-decoder model  $g_{\theta}(\mathbf{z}_t, t; \mathbf{x})$  to approximate  $\mathbf{z}_0$  [Lin et al., 2023] in a NAR manner and then estimate  $\mu_{\theta}(\mathbf{z}_t, t; \mathbf{x})$ .

In consequence, combined with maximizing the evidence lower bound (ELBO) of  $\log p_{\theta}(\mathbf{y}|\mathbf{x})$ , our training objective of the conditional diffusion language model is:

$$\mathcal{L} = \mathbb{E}_{q_{\phi}(\mathbf{z}_0, T|\mathbf{y})} \left[ -\log p_{\theta}(\mathbf{y} | \mathbf{z}_0; \mathbf{x}) + \sum_{t=1}^T \|\mathbf{z}_0 - g_{\theta}(\mathbf{z}_t, t; \mathbf{x})\|^2 \right]. \quad (3)$$

## 3 Methodology

### 3.1 Multi-Level Diffusion

In the typical diffusion process, every token in the text sequence has the same diffusion timestep. In order to leverage the sequential nature of language, we enable tokens to have different diffusion timesteps during the forward and reverse pass. To accomplish this, we propose a multi-level diffusion strategy that includes both sentence-level and token-level diffusion. Firstly, at the sentence-level, we follow Diffusion-LM [Li et al., 2022a] to randomly select a timestep  $t$ . Secondly, at the token-level, we incorporate positional information  $n \in [1, N]$  based on the sentence-level timestep to regulate the diffusion timestep for the current token. The procedure is illustrated as:

$$\mathbf{z}_t = (\mathbf{z}_{f(1,t)}^1, \mathbf{z}_{f(2,t)}^2, \dots, \mathbf{z}_{f(N,t)}^N), \quad (4)$$

where  $N$  is the given target sentence length,  $\mathbf{z}_t$  is the sentence representation at timestep<sup>1</sup>  $t$ ,  $\mathbf{z}_{f(n,t)}^n$  is the latent representation for the  $n$ -th token at sentence-level timestep  $t$ , and  $f(n, t)$  is a token-level timestep function that denotes the token-level diffusion timestep determined by token position  $n$  and sentence-level timestep  $t$ .

We visualize the token-level timestep  $(n, f(n, t))$  onto a two-dimensional coordinate system as Figure 1, which takes the token **position** as the horizontal axis and the sentence-level **timestep** as the

<sup>1</sup>Please note that if we talk about a “timestep” without explicitly indicating that it is for token-level, it should be for sentence-level.

vertical axis. Furthermore, to provide a more profound description of the characteristics of movement, we define the speed of movement as the following equation.

$$v(n, t_i, t_{i+1}) = f(n, t_{i+1}) - f(n, t_i), \quad (5)$$

where  $t_i$  and  $t_{i+1}$  are the start and end sentence-level diffusion timesteps. It can be observed that tokens in Diffusion-LM share the same movement speed, while those in AR exhibit different speeds.

### 3.2 Token-Level Diffusion with Dynamic Movement Speed

Based on the speed of movement, we propose a fundamental principle, dynamic movement speed, for designing the token-level diffusion timestep function  $f(n, t)$  to take advantage of AR in diffusion. Specifically, elements on the left side of a sentence undergo higher movement speed from random Gaussian noise to token embedding, while those on the right side experience lower movement speed, thereby they can be generated in the later sentence-level timestep and utilize information from previously generated tokens more effectively.

---

#### Algorithm 1 Training Process of AR-DIFFUSION.

---

**Input:** Dataset  $\{(\mathbf{x}, \mathbf{y})\}$ , maximum timestep number  $T$  and maximum target length  $N$ .

**Output:** Optimized model parameters  $\theta$ .

1: Define an anchor point  $(n_e, t_e)^2$ .

2: **repeat**

3:   Sample  $(\mathbf{x}, \mathbf{y})$  from the dataset and embed  $\mathbf{y}$  into  $\mathbf{z}_0$ .

4:   Sample a sentence-level timestep  $t$  from the interval  $[0, N + T]$ , then the start point is determined by the following equation:

$$(n_s, t_s) = (\text{clip}(N - t, 0, N), \text{clip}(t - N, 0, T)) \quad (6)$$

5:   Use the point-slope linear function to determine the token-level timestep  $f(n, t)$  in position  $n$ :

$$f(n, t) = \text{clip}\left(\frac{t_e - t_s}{n_e - n_s}(n - n_s) + t_s, 0, T\right) \quad (7)$$

6:   Sample  $\mathbf{z}_{f(n,t)}^n$  for each  $n$  in different positions with Gaussian reparameterization.

7:   According to equation (3) and equation (9), employ gradient descent to optimize the objective:

$$\min_{\theta} \left[ -\log p_{\theta}(\mathbf{y} \mid \mathbf{z}_0; \mathbf{x}) + \sum_{n=1}^N \left\| \mathbf{g}_{\theta}(\mathbf{z}_{f(n,t)}^n, f(n, t); \mathbf{x}) - \mathbf{z}_0 \right\|^2 \right] \quad (8)$$

8: **until** converged

---

Following the guidance of the principle, we develop a token-level diffusion strategy with the linear function, which is shown in Figure 1(c). In particular, the procedure is illustrated in Algorithm 1, where  $\text{clip}(x, \min, \max)$  function is to clamp all elements in  $x$  into the range  $[\min, \max]$ . Specifically, in the forward process of diffusion, the start point goes to the left from  $(N, 0)$  to  $(0, 0)$  along the horizontal axis and then moves up to  $(0, T)$  along the vertical axis. Therefore, the entire range of sentence-level timestep is extended to  $[0, N + T]$ .

In the reverse diffusion process, the multi-level diffusion follows the formula:

$$\mathbf{g}_{\theta}(\mathbf{z}_t, t; \mathbf{x}) = \mathbf{g}_{\theta}\left((\mathbf{z}_{f(1,t)}^1, f(1, t)), (\mathbf{z}_{f(2,t)}^2, f(2, t)), \dots, (\mathbf{z}_{f(N,t)}^N, f(N, t)); \mathbf{x}\right), \quad (9)$$

where  $\mathbf{g}_{\theta}(\mathbf{z}_{f(n,t)}^n, f(n, t); \mathbf{x})$  denotes the  $n$ -th element.

### 3.3 Inference with Skipping

Typically, the generation process needs to go through all the sentence-level timesteps from  $T + N$  to 0. To reduce the decoding time, we introduce a skipping mechanism that allows us to traverse a subset of timesteps.

---

<sup>2</sup>In particular, the anchor point is set as  $(2 \times N, T)$  in our implementation. The impact of different choices of the anchor point is discussed in supplementary material D.

---

**Algorithm 2** Inference Process of AR-DIFFUSION with the Skipping Mechanism.

---

**Input:** Source condition  $\mathbf{x}$ , number of decoding steps  $M$  and model parameters  $\theta$ .

**Output:** Predicted target embedding  $\hat{\mathbf{y}}$ .

- 1: Define an anchor point  $(n_e, t_e)$ .
- 2: Uniformly select a decreasing sequence of timesteps  $\{t_i\}_{i=0}^M$  ranging from  $T + N$  to 0.
- 3: Sample  $\mathbf{z}_{t_0} \sim \mathcal{N}(\mathbf{0}, \mathbf{I})$ .
- 4: **for**  $i = 0$  to  $M - 1$  **do**
- 5:   Calculate the start point  $(n_s, t_s)$  using equation (6).
- 6:   Based on the current sentence-level inference steps  $t_i$  and the next one  $t_{i+1}$ , assign token-level timesteps  $f(n, t_i)$  and  $f(n, t_{i+1})$  to token in position  $n$  using equation (7).
- 7:   Reverse sample  $\mathbf{z}_{t_{i+1}} = (\mathbf{z}_{f(1, t_{i+1})}^1, \mathbf{z}_{f(2, t_{i+1})}^2, \dots, \mathbf{z}_{f(N, t_{i+1})}^N)$  from  $p_\theta(\mathbf{z}_{t_{i+1}} \mid \mathbf{z}_{t_i}; \mathbf{x})$  with the following formulas:

$$p_\theta(\mathbf{z}_{t_{i+1}} \mid \mathbf{z}_{t_i}; \mathbf{x}) = \prod_{n=1}^N p_\theta(\mathbf{z}_{f(n, t_{i+1})}^n \mid \mathbf{z}_{f(n, t_i)}^n; \mathbf{x}) \quad (10)$$

$$p_\theta(\mathbf{z}_{f(n, t_{i+1})}^n \mid \mathbf{z}_{f(n, t_i)}^n; \mathbf{x}) \sim \mathcal{N}(\mathbf{z}_{f(n, t_{i+1})}^n; \lambda \mathbf{z}_{f(n, t_i)}^n + \mu \mathbf{g}_\theta(\mathbf{z}_{f(n, t_i)}^n, f(n, t_i); \mathbf{x}), \sigma \mathbf{I}) \quad (11)$$

8: **end for**

9: Map  $\mathbf{z}_{t_M}$  to the nearest embedding  $\hat{\mathbf{y}}$ .

---

128 In practice, we propose an algorithm for the inference, illustrated in Algorithm 2.

$$\lambda = \frac{\sqrt{\frac{\bar{\alpha}_{f(n, t_i)}}{\bar{\alpha}_{f(n, t_{i+1})}}}(1 - \bar{\alpha}_{f(n, t_{i+1})})}{1 - \bar{\alpha}_{f(n, t_i)}}, \mu = \frac{\sqrt{\bar{\alpha}_{f(n, t_{i+1})}}(1 - \frac{\bar{\alpha}_{f(n, t_i)}}{\bar{\alpha}_{f(n, t_{i+1})}})}{1 - \bar{\alpha}_{f(n, t_i)}}, \sigma = \frac{(1 - \alpha_{f(n, t_i)})(1 - \bar{\alpha}_{f(n, t_{i+1})})}{1 - \bar{\alpha}_{f(n, t_i)}} \quad (12)$$

129 In equation (10), the conditional distribution of  $\mathbf{z}_{t_{i+1}}$  is inferred by  $p_\theta(\mathbf{z}_{t_{i+1}} \mid \mathbf{z}_{t_i}; \mathbf{x})$ , and then we  
130 decompose it by positions due to the independent forward process of elements at different positions.  
131 From equation (11) to equation (12), we establish the relationship between tokens at different  
132 timesteps, and the detailed derivation can be found in supplementary material E.

## 133 4 Experiments

### 134 4.1 Tasks and Datasets

135 **Text Summarization** This task involves taking a long document as input and generating a concise  
136 sentence as output. This requires models with the ability to identify important content and rewrite it  
137 in a condensed form. In our experiments, we use the publicly available XSUM [Narayan et al., 2018]  
138 and CNN/DAILYMAIL Hermann et al. [2015] on GLGE<sup>3</sup>, which is also named as GLGE-Easy.

139 **Machine Translation** Translation is a widely used sequence-to-sequence task. The input is a  
140 sequence of words in the source language, and the output is a sequence of corresponding words in the  
141 target language. We choose the IWSLT 2014 dataset and the data processing method is to follow the  
142 scripts provided by fairseq<sup>4</sup>.

143 **Common Sense Generation** In this task, the model is provided with a concept set consisting of  
144 objects and actions as input. The objective is to generate a sentence that incorporates these concepts  
145 and describes a realistic scenario. We use COMMONGEN<sup>5</sup> dataset for evaluation.

### 146 4.2 Main Results

147 The results on different datasets are shown in Table 1, Table 2, Table 3 and Table 4. The best  
148 result is **bolded** and the second-best result is underlined. “ $k$ ” indicates the number of generated

---

<sup>3</sup><https://microsoft.github.io/glge/>

<sup>4</sup><https://github.com/facebookresearch/fairseq/tree/main/examples/translation>

<sup>5</sup><https://inklab.usc.edu/CommonGen/>

candidate samples<sup>6</sup>. It can be seen from the results in each table that AR-DIFFUSION achieves the best performance.

During the inference process, we utilize **20** inference steps and employ Minimum Bayes Risk (MBR) [Kumar and Byrne, 2004] decoding to select the best sample, following [Li et al., 2022a]. We choose MBR instead of the selection approach in GENIE, as GENIE picks up the best sample by calculating the maximum score for each generated one using ground truth, which introduces unfairness. To ensure a fair comparison, we re-implement GENIE using our configuration and perform inference with 20 steps. More experimental details can be found in the supplementary material B.

Table 1: Results on XSUM test set. The results of NAR and Semi-NAR are from Qi et al. [2021], and the results of AR are from GLGE [Liu et al., 2021].

| Methods                               | Pattern         | ROUGE-1     | ROUGE-2     | ROUGE-L     |
|---------------------------------------|-----------------|-------------|-------------|-------------|
| NAT [Gu et al., 2017]                 | NAR             | 24.0        | 3.9         | 20.3        |
| iNAT [Lee et al., 2018]               |                 | 24.0        | 4.0         | 20.4        |
| CMLM [Ghazvininejad et al., 2019]     |                 | 23.8        | 3.6         | 20.2        |
| LevT [Gu et al., 2019]                |                 | 24.8        | 4.2         | 20.9        |
| InsT [Stern et al., 2019]             | Semi-NAR        | 17.7        | 5.2         | 16.1        |
| iNAT [Lee et al., 2018]               |                 | 27.0        | 6.9         | 22.4        |
| CMLM [Ghazvininejad et al., 2019]     |                 | 29.1        | 7.7         | 23.0        |
| LevT [Gu et al., 2019]                |                 | 25.3        | 7.4         | 21.5        |
| LSTM [Greff et al., 2017]             | AR <sup>7</sup> | 25.1        | 6.9         | 19.9        |
| Transformer [Vaswani et al., 2017]    |                 | 30.5        | <u>10.4</u> | 24.2        |
| GENIE [Lin et al., 2023] ( $k = 50$ ) | Diffusion       | 29.3        | 8.3         | 21.9        |
| AR-DIFFUSION ( $k = 50$ )             |                 | <u>31.7</u> | 10.1        | <u>24.7</u> |
| AR-DIFFUSION ( $k = 500$ )            |                 | <b>32.2</b> | <b>10.6</b> | <b>25.2</b> |

Table 2: Results on CNN/DAILYMAIL test set. The results of AR are from GLGE Liu et al. [2021].

| Methods                               | Pattern   | ROUGE-1     | ROUGE-2     | ROUGE-L     |
|---------------------------------------|-----------|-------------|-------------|-------------|
| LSTM [Greff et al., 2017]             | AR        | 37.3        | 15.7        | 34.4        |
| Transformer [Vaswani et al., 2017]    |           | 39.5        | <u>16.7</u> | 36.7        |
| GENIE [Lin et al., 2023] ( $k = 50$ ) | Diffusion | 34.4        | 12.8        | 32.1        |
| AR-DIFFUSION ( $k = 50$ )             |           | <u>39.6</u> | 16.3        | <u>37.1</u> |
| AR-DIFFUSION ( $k = 500$ )            |           | <b>40.2</b> | <b>17.1</b> | <b>37.7</b> |

**Text Summarization** The results presented in Table 1 and Table 2 clearly demonstrate that AR-DIFFUSION outperforms the existing NAR and Semi-NAR approaches across all metrics. Moreover, AR-DIFFUSION consistently achieves significant improvements over GENIE in terms of all indicators. Furthermore, in comparison to Transformer, AR-DIFFUSION outperforms it on both ROUGE-1 and ROUGE-L, while achieving comparable performance in terms of ROUGE-2. Notably, when the sample number is 500, AR-DIFFUSION demonstrates superiority over Transformer across all the measures.

**Machine Translation** Table 3 presents the BLEU score implemented by SeqDiffuSeq setting<sup>8</sup>. AR-DIFFUSION outperforms the non-auto-regressive CNAT in greedy search for a single sample, and achieves a substantial gain. Moreover, the BLEU score of AR-DIFFUSION surpasses GENIE by a large margin and shows a slightly better performance than the AR Transformer. Specially, AR-DIFFUSION achieves a more powerful result at  $k = 500$ .

**Common Sense Generation** As depicted in Table 4, AR-DIFFUSION achieves superior performance compared to the current AR, NAR, and other diffusion methods across all the metrics on the COMMONGEN dataset.

<sup>6</sup>The relationship between sample number and results is discussed in supplementary material D.

<sup>7</sup>Notably, although AR’s beam search has a small beam, the search space may be larger than 50 or even 500.

<sup>8</sup>We also report SacreBLEU in supplementary material C to compare with DINOISER.

Table 3: Results on IWSLT14 DE→EN test set following the setting of SEQDIFFUSeq. “NFE” indicates the Number of Function Evaluations [Ye et al., 2023].

| Methods                                         | Pattern   | BLEU         | Steps | NFE (Steps× <i>k</i> ) |
|-------------------------------------------------|-----------|--------------|-------|------------------------|
| Transformer [Vaswani et al., 2017]              | AR        | 34.74        | -     | -                      |
| CNAT [Bao et al., 2021]                         | NAR       | 29.81        | -     | -                      |
| SeqDiffuSeq [Yuan et al., 2022] ( <i>k</i> = 1) | Diffusion | 29.83        | 2,000 | 2,000 (2,000 × 1)      |
| AR-DIFFUSION ( <i>k</i> = 1)                    |           | 30.19        | 20    | 20 (20 × 1)            |
| GENIE [Lin et al., 2023] ( <i>k</i> = 50)       | Diffusion | 30.08        | 20    | 1,000 (20 × 50)        |
| AR-DIFFUSION ( <i>k</i> = 50)                   |           | 34.95        | 20    | 1,000 (20 × 50)        |
| AR-DIFFUSION ( <i>k</i> = 500)                  |           | <b>35.62</b> | 20    | 10,000 (20 × 500)      |

Table 4: Results on COMMONGEN dev set. Results of NAR and AR are from Lin et al. [2020].

| Methods                                   | Pattern   | ROUGE-2/L    |              | BLEU-3/4     |              | METEOR       | SPICE        |
|-------------------------------------------|-----------|--------------|--------------|--------------|--------------|--------------|--------------|
| bRNN-CopyNet [Gu et al., 2016]            | AR        | 9.23         | 30.57        | 13.60        | 7.80         | 17.40        | 16.90        |
| Trans-CopyNet [Lin et al., 2020]          |           | 11.08        | 32.57        | 17.20        | 10.60        | 18.80        | 18.00        |
| MeanPooling-CopyNet [Lin et al., 2020]    |           | 11.36        | 34.63        | 14.80        | 8.90         | 19.20        | 20.20        |
| LevT [Gu et al., 2019]                    | NAR       | 12.22        | <u>35.42</u> | <u>23.10</u> | <u>15.00</u> | 22.10        | 21.40        |
| ConstLeven [Susanto et al., 2020]         |           | <u>13.47</u> | 35.19        | 21.30        | 12.30        | <b>25.00</b> | <u>23.20</u> |
| GENIE [Lin et al., 2023] ( <i>k</i> = 50) | Diffusion | 12.89        | 35.21        | 22.00        | 13.30        | <u>24.30</u> | 23.00        |
| AR-DIFFUSION ( <i>k</i> = 50)             |           | <b>13.93</b> | <b>37.36</b> | <b>25.60</b> | <b>16.40</b> | <b>25.00</b> | <b>24.20</b> |

### 4.3 Inference Efficiency

First, we use the number of function evaluations (NFE) as a measure to compare inference efficiency [Ye et al., 2023] in machine translation. From Table 3, it is evident that even when the NFE is reduced to 1% of SeqDiffuSeq (equivalent to 100× faster), AR-DIFFUSION still outperforms SeqDiffuSeq. Moreover, increasing the number of generated candidate samples (*k* = 500) leads to further performance improvements, albeit with increased time consumption.

Second, we conduct experiments with an **extremely limited number of inference steps** (2 and 3)<sup>9</sup> and compare the performance with that of GENIE in XSUM. The results are presented in Table 5. When reducing the number of steps to 2, GENIE experiences a significant decline, with an average score of 4.20 in the AVG Drop column, while AR-DIFFUSION exhibits a comparatively smaller decrease of 1.34. Furthermore, with 3 steps, although the performance deterioration of GENIE is somewhat reduced, the average score still shows a decline of 2.81. In contrast, AR-DIFFUSION maintains a high performance level, with an average score differing from the 20-step result by only 0.64. Notably, the results of AR-DIFFUSION at 3 steps are comparable to the results of GENIE at 2,000 steps. Therefore, compared to GENIE, the inference speed of AR-DIFFUSION can be accelerated by up to 600×.

### 4.4 Analysis

**Diversity of Samples** Diversity is a key advantage of diffusion models. To measure the diversity of generated samples, We adopt the SELF-BLEU [Zhu et al., 2018] metric, in which a lower score indicates higher diversity. In Lin et al. [2023], various sampling methods were applied to the pre-trained auto-regressive model BART<sup>10</sup>. As shown in Table 6, AR-DIFFUSION achieves significantly higher diversity compared to the auto-regressive model. Furthermore, the diversity can be comparable to GENIE with a better performance.

**Ablation Study** To demonstrate the effectiveness of our proposed method, we perform ablation experiments on the XSUM dataset. Our results show that both our proposed multi-level diffusion and skipping mechanism are essential for achieving the high performance of AR-DIFFUSION.

<sup>9</sup>The time consumed by each step in the inference process is exactly the same.

<sup>10</sup>Specific details are written in supplementary material F.

Table 5: Experimental results of GENIE and AR-DIFFUSION with inference steps of **2** and **3** on XSUM test set. Take  $k = 10$  to apply the MBR decoding strategy. (·) indicates the **drop** score compared to the 20-step.

| Methods      | Steps | NFE    | ROUGE-1       | ROUGE-2      | ROUGE-L       | AVG Drop    |
|--------------|-------|--------|---------------|--------------|---------------|-------------|
| GENIE        | 2,000 | 20,000 | 30.36         | 8.78         | 23.31         | -           |
|              | 20    | 200    | 28.33         | 7.46         | 21.15         | -           |
|              | 3     | 30     | 25.03 (-3.30) | 5.32 (-2.14) | 18.17 (-2.98) | 2.81        |
|              | 2     | 20     | 23.45 (-4.88) | 3.95 (-3.51) | 16.94 (-4.21) | 4.20        |
| AR-DIFFUSION | 20    | 200    | 30.99         | 9.32         | 23.95         | -           |
|              | 3     | 30     | 30.23 (-0.76) | 8.68 (-0.64) | 23.43 (-0.52) | <b>0.64</b> |
|              | 2     | 20     | 29.28 (-1.71) | 7.99 (-1.33) | 22.98 (-0.97) | <b>1.34</b> |

Table 6: Diversity of **10** generated samples on XSUM test set and average of **10** results. The results of BART and GENIE are quoted from Lin et al. [2023].

| Methods     | BART          |             |                     |                |              |                | GENIE     | AR-DIFFUSION |
|-------------|---------------|-------------|---------------------|----------------|--------------|----------------|-----------|--------------|
| Sampling    | Greedy Search | Beam Search | Diverse Beam Search | Typical Sample | Top-k Sample | Nucleus Sample | Diffusion |              |
| SELF-BLEU ↓ | 100.0         | 93.4        | 75.6                | 76.9           | 80.2         | 79.1           | 29.3      | 30.4         |

Maintaining the skipping inference method, we remove the token-level diffusion during the training process, which degenerates to GENIE w/ skipping. The comparison results are shown in Figure 2(a). It can be observed that after removing, the AVG-ROUGE score is greatly lower after 2 steps.

The performance of applying our proposed skipping mechanism and DDIM [Song et al., 2021] to AR-DIFFUSION is shown in Figure 2(b). The results demonstrate that the skipping mechanism consistently outperforms DDIM in various inference steps. Additionally, the skipping mechanism can be easily applied to GENIE. As depicted in Figure 2(c), DDIM suffers a significant drop in performance when the number of inference steps is less than 40. In contrast, the skipping mechanism consistently maintains good performance across all inference steps.

**Case Study** By mapping the state to the token with the highest logits, we visualize the intermediate states of AR-DIFFUSION. As depicted in Figure 3, AR-DIFFUSION undergoes a denoising process, transforming the random Gaussian noise into a coherent sentence over 20 steps, and we present 5 of them. With the progression of each timestep, compared to the tokens on the right side of the sentence, the tokens on the left side demonstrate faster determination and a rapid increase in the corresponding logits. This behavior is consistent with our principle of dynamic movement speed from left to right.

## 5 Related Work

**AR and NAR Language Models** AR models have been the dominant approach for text generation [OpenAI, 2023, Touvron et al., 2023, Dong et al., 2023], but their token-by-token generation nature often leads to unsatisfactory inference speed. To address this issue, NAR models have been developed in recent years. The NAR method is initially proposed by Gu et al. [2017], its objective is generate the entire output sequence in parallel, thereby improving generation speed and efficiency. Subsequently, LevT [Gu et al., 2019] adopts insertion and deletion to address the lack of flexibility in NAR generation, CMLM [Ghazvininejad et al., 2019] utilizes a masked language model to improve the quality of NAR generation through a constant number of iterations, and CNAT [Bao et al., 2021] introduces latent variables to represent the category information of the target word to make full use of the latent representation. However, these NAR methods are hard to model inter-token position dependency and deficient in generation performance.

**Continuous Text Diffusion** The application of diffusion models to continuous text space is first introduced by Li et al. [2022a]. Through the embedding and rounding processes, the direct integration

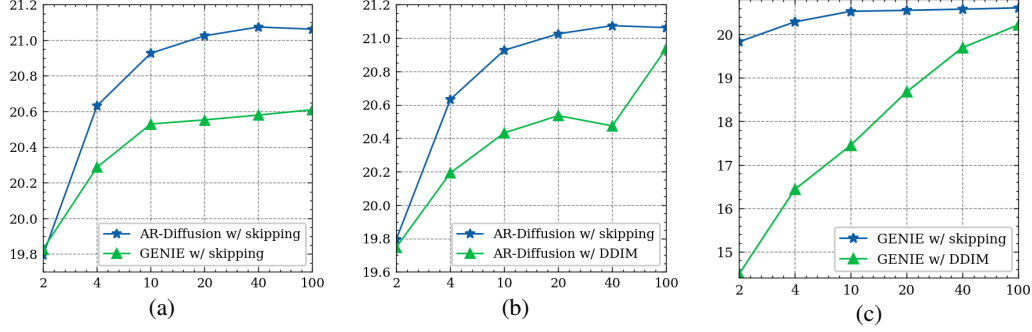

Figure 2: Ablation experiments on XSUM test set and taking  $k = 5$ . The horizontal axis is the number of inference steps and the vertical axis is  $\text{AVG-ROUGE} = (\text{ROUGE-1} + \text{ROUGE-2} + \text{ROUGE-L}) / 3$ .

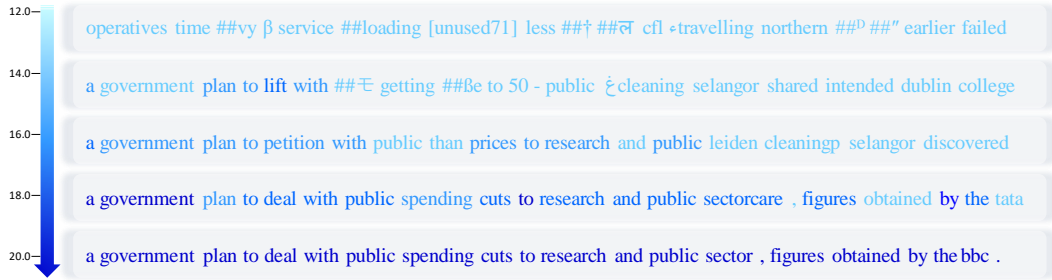

Figure 3: The intermediate state of AR-DIFFUSION gradually generating real text from a standard Gaussian noise through 20 steps. The brightness of the color represents the magnitude of the logits, with darker colors indicating larger logits. More cases are shown in the supplementary materials G.

of continuous noise into word embeddings was accomplished. After that, more people attempt to adopt continuous text diffusion model to solve sequence-to-sequence tasks. DiffuSeq [Gong et al., 2022] divides the input into two parts, utilizing one part as a condition, and perturbs the other part with noise. CDCD [Dieleman et al., 2022] proposes score interpolation and time warping to allow diffusion model and Euclidean embedding to share the same loss function for training. SeqDiffuSeq [Yuan et al., 2022], GENIE [Lin et al., 2023] and DINOISER [Ye et al., 2023] incorporate diffusion model into the encoder-decoder structure through cross-attention mechanisms.

It is important to highlight the differences between our method and both ARDMs [Hoogeboom et al., 2022] and TimeGrad [Rasul et al., 2021], despite the common references to autoregression and diffusion in all these. ARDMs employ an order-agnostic technique, leveraging masking and prediction for generation in arbitrary orders. On the other hand, TimeGrad integrates RNN and diffusion to model the conditional distribution of future steps of multivariate time series. In contrast, our research focuses on implementing the diffusion process within a continuous embedding space, with the primary aim of generating text in a left-to-right sequence.

## 6 Conclusion

This paper introduces AR-DIFFUSION, which exhibits AR-like generation behavior but enables efficient parallel decoding. Embracing the inherent sequential nature of language, we propose a multi-level diffusion model, consisting of sentence-level and token-level components, to assign dynamic movement speeds to tokens. Consequently, compared to those on the right, the left tokens undergo fewer denoising steps and generate earlier to subsequently influence the later ones. Furthermore, we introduce a skipping mechanism to facilitate parallel generation within the multi-level diffusion framework. The experimental results across various tasks demonstrate that AR-DIFFUSION surpasses existing diffusion models in terms of quality while maintaining diversity. Additionally, compared to existing diffusion language models, AR-DIFFUSION achieves comparable results while being  $100\times \sim 600\times$  faster.

## References

- OpenAI. GPT-4 technical report. *CoRR*, abs/2303.08774, 2023. doi: 10.48550/arXiv.2303.08774. URL <https://doi.org/10.48550/arXiv.2303.08774>.
- Hugo Touvron, Thibaut Lavril, Gautier Izacard, Xavier Martinet, Marie-Anne Lachaux, Timothée Lacroix, Baptiste Rozière, Naman Goyal, Eric Hambro, Faisal Azhar, Aurélien Rodriguez, Armand Joulin, Edouard Grave, and Guillaume Lample. Llama: Open and efficient foundation language models. *CoRR*, abs/2302.13971, 2023. doi: 10.48550/arXiv.2302.13971. URL <https://doi.org/10.48550/arXiv.2302.13971>.
- Rohan Taori, Ishaan Gulrajani, Tianyi Zhang, Yann Dubois, Xuechen Li, Carlos Guestrin, Percy Liang, and Tatsunori B. Hashimoto. Stanford alpaca: An instruction-following llama model. [https://github.com/tatsu-lab/stanford\\_alpaca](https://github.com/tatsu-lab/stanford_alpaca), 2023.
- Ashish Vaswani, Noam Shazeer, Niki Parmar, Jakob Uszkoreit, Llion Jones, Aidan N Gomez, Łukasz Kaiser, and Illia Polosukhin. Attention is all you need. In I. Guyon, U. Von Luxburg, S. Bengio, H. Wallach, R. Fergus, S. Vishwanathan, and R. Garnett, editors, *Advances in Neural Information Processing Systems*, volume 30. Curran Associates, Inc., 2017. URL [https://proceedings.neurips.cc/paper\\_files/paper/2017/file/3f5ee243547dee91fbd053c1c4a845aa-Paper.pdf](https://proceedings.neurips.cc/paper_files/paper/2017/file/3f5ee243547dee91fbd053c1c4a845aa-Paper.pdf).
- Tom Brown, Benjamin Mann, Nick Ryder, Melanie Subbiah, Jared D Kaplan, Prafulla Dhariwal, Arvind Neelakantan, Pranav Shyam, Girish Sastry, Amanda Askell, et al. Language models are few-shot learners. *Advances in neural information processing systems*, 33:1877–1901, 2020.
- Jonathan Ho, Ajay Jain, and Pieter Abbeel. Denoising diffusion probabilistic models. In Hugo Larochelle, Marc’Aurelio Ranzato, Raia Hadsell, Maria-Florina Balcan, and Hsuan-Tien Lin, editors, *Advances in Neural Information Processing Systems 33: Annual Conference on Neural Information Processing Systems 2020, NeurIPS 2020, December 6-12, 2020, virtual*, 2020. URL <https://proceedings.neurips.cc/paper/2020/hash/4c5bcfec8584af0d967f1ab10179ca4b-Abstract.html>.
- Xiang Lisa Li, John Thickstun, Ishaan Gulrajani, Percy Liang, and Tatsunori Hashimoto. Diffusion-LM improves controllable text generation. In Alice H. Oh, Alekh Agarwal, Danielle Belgrave, and Kyunghyun Cho, editors, *Advances in Neural Information Processing Systems*, 2022a. URL <https://openreview.net/forum?id=3s9IrEsJLyk>.
- Shansan Gong, Mukai Li, Jiangtao Feng, Zhiyong Wu, and Lingpeng Kong. Diffuseq: Sequence to sequence text generation with diffusion models. *CoRR*, abs/2210.08933, 2022. doi: 10.48550/arXiv.2210.08933. URL <https://doi.org/10.48550/arXiv.2210.08933>.
- Sander Dieleman, Laurent Sartran, Arman Roshannai, Nikolay Savinov, Yaroslav Ganin, Pierre H Richemond, Arnaud Doucet, Robin Strudel, Chris Dyer, Conor Durkan, et al. Continuous diffusion for categorical data. *arXiv preprint arXiv:2211.15089*, 2022.
- Hongyi Yuan, Zheng Yuan, Chuanqi Tan, Fei Huang, and Songfang Huang. Seqdiffuseq: Text diffusion with encoder-decoder transformers, 2022.
- Jiasheng Ye, Zaixiang Zheng, Yu Bao, Lihua Qian, and Mingxuan Wang. Dinoiser: Diffused conditional sequence learning by manipulating noises, 2023.
- Mike Lewis, Yinhan Liu, Naman Goyal, Marjan Ghazvininejad, Abdelrahman Mohamed, Omer Levy, Veselin Stoyanov, and Luke Zettlemoyer. BART: denoising sequence-to-sequence pre-training for natural language generation, translation, and comprehension. In Dan Jurafsky, Joyce Chai, Natalie Schluter, and Joel R. Tetreault, editors, *Proceedings of the 58th Annual Meeting of the Association for Computational Linguistics, ACL 2020, Online, July 5-10, 2020*, pages 7871–7880. Association for Computational Linguistics, 2020. doi: 10.18653/v1/2020.acl-main.703. URL <https://doi.org/10.18653/v1/2020.acl-main.703>.
- Weizhen Qi, Yu Yan, Yeyun Gong, Dayiheng Liu, Nan Duan, Jiusheng Chen, Ruofei Zhang, and Ming Zhou. ProphetNet: Predicting future n-gram for sequence-to-SequencePre-training. In *Findings of the Association for Computational Linguistics: EMNLP 2020*, pages 2401–2410,

Online, November 2020. Association for Computational Linguistics. doi: 10.18653/v1/2020.findings-emnlp.217. URL <https://aclanthology.org/2020.findings-emnlp.217>.

Weizhen Qi, Yeyun Gong, Jian Jiao, Yu Yan, Weizhu Chen, Dayiheng Liu, Kewen Tang, Houqiang Li, Jiusheng Chen, Ruofei Zhang, et al. Bang: Bridging autoregressive and non-autoregressive generation with large scale pretraining. In *International Conference on Machine Learning*, pages 8630–8639. PMLR, 2021.

Junyi Li, Tianyi Tang, Wayne Xin Zhao, Jian-Yun Nie, and Ji-Rong Wen. ELMER: A non-autoregressive pre-trained language model for efficient and effective text generation. In Yoav Goldberg, Zornitsa Kozareva, and Yue Zhang, editors, *Proceedings of the 2022 Conference on Empirical Methods in Natural Language Processing, EMNLP 2022, Abu Dhabi, United Arab Emirates, December 7-11, 2022*, pages 1044–1058. Association for Computational Linguistics, 2022b. URL <https://aclanthology.org/2022.emnlp-main.68>.

Yafu Li, Leyang Cui, Yongjing Yin, and Yue Zhang. Multi-granularity optimization for non-autoregressive translation. In Yoav Goldberg, Zornitsa Kozareva, and Yue Zhang, editors, *Proceedings of the 2022 Conference on Empirical Methods in Natural Language Processing, EMNLP 2022, Abu Dhabi, United Arab Emirates, December 7-11, 2022*, pages 5073–5084. Association for Computational Linguistics, 2022c. URL <https://aclanthology.org/2022.emnlp-main.339>.

Yu Bao, Shujian Huang, Tong Xiao, Dongqi Wang, Xinyu Dai, and Jiajun Chen. Non-autoregressive translation by learning target categorical codes. In *Proceedings of the 2021 Conference of the North American Chapter of the Association for Computational Linguistics: Human Language Technologies*, pages 5749–5759, Online, June 2021. Association for Computational Linguistics. doi: 10.18653/v1/2021.naacl-main.458. URL <https://aclanthology.org/2021.naacl-main.458>.

Zhenghao Lin, Yeyun Gong, Yelong Shen, Tong Wu, Zhihao Fan, Chen Lin, Nan Duan, and Weizhu Chen. Text generation with diffusion language models: A pre-training approach with continuous paragraph denoise, 2023.

Jiatao Gu, James Bradbury, Caiming Xiong, Victor OK Li, and Richard Socher. Non-autoregressive neural machine translation. *arXiv preprint arXiv:1711.02281*, 2017.

Shashi Narayan, Shay B. Cohen, and Mirella Lapata. Don’t give me the details, just the summary! topic-aware convolutional neural networks for extreme summarization. In *Proceedings of the 2018 Conference on Empirical Methods in Natural Language Processing*, pages 1797–1807, Brussels, Belgium, October-November 2018. Association for Computational Linguistics. doi: 10.18653/v1/D18-1206. URL <https://aclanthology.org/D18-1206>.

Karl Moritz Hermann, Tomas Kocisky, Edward Grefenstette, Lasse Espeholt, Will Kay, Mustafa Su-leyman, and Phil Blunsom. Teaching machines to read and comprehend. In C. Cortes, N. Lawrence, D. Lee, M. Sugiyama, and R. Garnett, editors, *Advances in Neural Information Processing Systems*, volume 28. Curran Associates, Inc., 2015. URL [https://proceedings.neurips.cc/paper\\_files/paper/2015/file/afdec7005cc9f14302cd0474fd0f3c96-Paper.pdf](https://proceedings.neurips.cc/paper_files/paper/2015/file/afdec7005cc9f14302cd0474fd0f3c96-Paper.pdf).

Shankar Kumar and William Byrne. Minimum bayes-risk decoding for statistical machine translation. Technical report, JOHNS HOPKINS UNIV BALTIMORE MD CENTER FOR LANGUAGE AND SPEECH PROCESSING (CLSP), 2004.

Dayiheng Liu, Yu Yan, Yeyun Gong, Weizhen Qi, Hang Zhang, Jian Jiao, Weizhu Chen, Jie Fu, Linjun Shou, Ming Gong, et al. Glge: A new general language generation evaluation benchmark. In *Findings of the Association for Computational Linguistics: ACL-IJCNLP 2021*, pages 408–420, 2021.

Jason Lee, Elman Mansimov, and Kyunghyun Cho. Deterministic non-autoregressive neural sequence modeling by iterative refinement. *arXiv preprint arXiv:1802.06901*, 2018.

Marjan Ghazvininejad, Omer Levy, Yinhan Liu, and Luke Zettlemoyer. Mask-predict: Parallel decoding of conditional masked language models. In *Proceedings of the 2019 Conference on Empirical Methods in Natural Language Processing and the 9th International Joint Conference on Natural Language Processing (EMNLP-IJCNLP)*, pages 6112–6121, Hong Kong, China, November 2019. Association for Computational Linguistics. doi: 10.18653/v1/D19-1633. URL <https://aclanthology.org/D19-1633>.

353 Jiatao Gu, Changhan Wang, and Junbo Zhao. Levenshtein transformer. In *Advances in Neural*  
354 *Information Processing Systems*, pages 11181–11191, 2019.

355 Mitchell Stern, William Chan, Jamie Kiros, and Jakob Uszkoreit. Insertion transformer: Flexible  
356 sequence generation via insertion operations. *arXiv preprint arXiv:1902.03249*, 2019.

357 Klaus Greff, Rupesh Kumar Srivastava, Jan Koutník, Bas R. Steunebrink, and Jürgen Schmidhuber.  
358 LSTM: A search space odyssey. *IEEE Trans. Neural Networks Learn. Syst.*, 28(10):2222–2232,  
359 2017.

360 Bill Yuchen Lin, Wangchunshu Zhou, Ming Shen, Pei Zhou, Chandra Bhagavatula, Yejin Choi, and  
361 Xiang Ren. CommonGen: A constrained text generation challenge for generative commonsense  
362 reasoning. In *Findings of the Association for Computational Linguistics: EMNLP 2020*, pages  
363 1823–1840, Online, November 2020. Association for Computational Linguistics. doi: 10.18653/v1/  
364 2020.findings-emnlp.165. URL <https://aclanthology.org/2020.findings-emnlp.165>.

365 Jiatao Gu, Zhengdong Lu, Hang Li, and Victor O. K. Li. Incorporating copying mechanism in  
366 sequence-to-sequence learning. In *ACL (1)*. The Association for Computer Linguistics, 2016.

367 Raymond Hendy Susanto, Shamil Chollampatt, and Liling Tan. Lexically constrained neural machine  
368 translation with levenshtein transformer. In *ACL*, pages 3536–3543. Association for Computational  
369 Linguistics, 2020.

370 Yaoming Zhu, Sidi Lu, Lei Zheng, Jiaxian Guo, Weinan Zhang, Jun Wang, and Yong Yu. Texusgen:  
371 A benchmarking platform for text generation models. In *The 41st international ACM SIGIR*  
372 *conference on research & development in information retrieval*, pages 1097–1100, 2018.

373 Jiaming Song, Chenlin Meng, and Stefano Ermon. Denoising diffusion implicit models. In *9th*  
374 *International Conference on Learning Representations, ICLR 2021, Virtual Event, Austria, May*  
375 *3-7, 2021*. OpenReview.net, 2021. URL <https://openreview.net/forum?id=St1giarCHLP>.

376 Chenhe Dong, Yinghui Li, Haifan Gong, Miaoxin Chen, Junxin Li, Ying Shen, and Min Yang. A  
377 survey of natural language generation. *ACM Comput. Surv.*, 55(8):173:1–173:38, 2023. doi:  
378 10.1145/3554727. URL <https://doi.org/10.1145/3554727>.

379 Emiel Hoogeboom, Alexey A. Gritsenko, Jasmijn Bastings, Ben Poole, Rianne van den Berg,  
380 and Tim Salimans. Autoregressive diffusion models. In *International Conference on Learning*  
381 *Representations*, 2022. URL <https://openreview.net/forum?id=Lm8T39vLDTE>.

382 Kashif Rasul, Calvin Seward, Ingmar Schuster, and Roland Vollgraf. Autoregressive denoising  
383 diffusion models for multivariate probabilistic time series forecasting. In Marina Meila and Tong  
384 Zhang, editors, *Proceedings of the 38th International Conference on Machine Learning*, volume  
385 139 of *Proceedings of Machine Learning Research*, pages 8857–8868. PMLR, 18–24 Jul 2021.  
386 URL <https://proceedings.mlr.press/v139/rasul21a.html>.

387 Taku Kudo and John Richardson. SentencePiece: A simple and language independent subword  
388 tokenizer and detokenizer for neural text processing. In *Proceedings of the 2018 Conference*  
389 *on Empirical Methods in Natural Language Processing: System Demonstrations*, pages 66–71,  
390 Brussels, Belgium, November 2018. Association for Computational Linguistics. doi: 10.18653/v1/  
391 D18-2012. URL <https://aclanthology.org/D18-2012>.

392 Calvin Luo. Understanding diffusion models: A unified perspective. *arXiv preprint arXiv:2208.11970*,  
393 2022.

394 Yisheng Xiao, Lijun Wu, Junliang Guo, Juntao Li, Min Zhang, Tao Qin, and Tie-Yan Liu. A survey on  
395 non-autoregressive generation for neural machine translation and beyond. *CoRR*, abs/2204.09269,  
396 2022.

397 Ashwin K. Vijayakumar, Michael Cogswell, Ramprasaath R. Selvaraju, Qing Sun, Stefan Lee,  
398 David J. Crandall, and Dhruv Batra. Diverse beam search: Decoding diverse solutions from neural  
399 sequence models. *CoRR*, abs/1610.02424, 2016.

400 Clara Meister, Tiago Pimentel, Gian Wiher, and Ryan Cotterell. Typical decoding for natural language  
401 generation. *CoRR*, abs/2202.00666, 2022.

- 402 Angela Fan, Mike Lewis, and Yann N. Dauphin. Hierarchical neural story generation. In *ACL (1)*,  
403 pages 889–898. Association for Computational Linguistics, 2018.
- 404 Ari Holtzman, Jan Buys, Li Du, Maxwell Forbes, and Yejin Choi. The curious case of neural text  
405 degeneration. In *ICLR*. OpenReview.net, 2020.

## A Limitation

A primary limitation of our work lies in the requirement of generating a large number of candidate samples for optimal performance. As an illustration in Table 2 of CNN/DAILYMAIL dataset, AR-DIFFUSION ( $k = 50$ ) achieves a 0.8 lower ROUGE-2 score compared to AR-DIFFUSION ( $k = 500$ ). We anticipate exploring more efficient sampling strategies to minimize the number of generated samples without performance drop.

## B Experimental Details

**Model Setup** Our model configuration is implemented based on Transformer-base [Vaswani et al., 2017]. In particular, For XSUM and CNN/DAILYMAIL, we set the diffusion embedding dimension to 128. For IWSLT14, we use 64-dimensional diffusion embedding, 4 attention heads and 1024-dimensional feed-forward layers. For COMMONGEN, we adopt 64-dimensional diffusion embedding, 8 attention heads and 512-dimensional feed-forward layers.

**Training and Inference** In the training phase, we employ a square-root noise schedule and 2,000 diffusion steps [Li et al., 2022a]. Specially, we use the tokenizer and vocabulary constructed by Byte Pair Encoding (BPE)<sup>11</sup> [Kudo and Richardson, 2018] for translation tasks. For other tasks, we adopt the tokenizer and vocabulary of bert-base-uncased.

**Baselines** We set four groups of baselines:

- NAR: NAT [Gu et al., 2017], iNAT [Lee et al., 2018], CMLM [Ghazvininejad et al., 2019], LevT [Gu et al., 2019] and CNAT [Bao et al., 2021];
- Semi-NAR: InsT [Stern et al., 2019], iNAT [Lee et al., 2018], CMLM [Ghazvininejad et al., 2019] and LevT [Gu et al., 2019];
- AR: bRNN [Gu et al., 2016], LSTM [Greff et al., 2017] and Transformer [Vaswani et al., 2017];
- Diffusion: DiffusionLM [Li et al., 2022a], CDCD [Dieleman et al., 2022], SeqDiffuSeq [Yuan et al., 2022], DINOISER [Ye et al., 2023] and GENIE [Lin et al., 2023].

**Metrics** We follow the approach of Qi et al. [2020]<sup>12</sup> to evaluate the **ROUGE-1/2/L** of the summarization task. For the evaluation of translation tasks, we adopt the setting of SeqDiffuSeq [Yuan et al., 2022] to report BLEU score. In addition, we also calculate the SacreBLEU score according to the setting of DINOISER [Ye et al., 2023] for comparison. For COMMONGEN, we employ ROUGE-2/L, BLEU-3/4, METEOR and SPICE under the evaluation methods of Lin et al. [2020]<sup>13</sup>.

**Training Parameters** Our training parameters on different datasets are shown in Table 7. Our linear schedule warm up steps is  $4,000 \times N_{gc}$ , where  $N_{gc}$  denotes gradient accumulation number. In addition, we use the AdamW (weight decay = 0.0) optimizer and dropout is 0.2. All experiments are implemented on 8 Tesla V100-32G. It takes about 20 hours to train XSUM and CNN/DAILYMAIL, about 5 hours to train IWSLT14, and about 2 hours to train COMMENGEM.

## C More Results on IWSLT14

In Table 8 we give the SacreBLEU score according to the setting of DINOISER. AR-DIFFUSION has notable improvements over non-auto-regressive CMLM. Besides, AR-DIFFUSION achieves excellent performance among text diffusion models for both EN→DE and DE→EN tasks. Specifically, AR-DIFFUSION is far superior to GENIE and comparable to the newly proposed DINOISER at  $n = 50$ . Nevertheless, the performance is stronger than DINOISER when  $k = 500$ <sup>14</sup>.

<sup>11</sup>We train bpe on the training set, and follow the vocabulary size of fairseq, IWSLT14 is set to 10,000.

<sup>12</sup>[https://github.com/microsoft/ProphetNet/tree/master/GLGE\\_baselines](https://github.com/microsoft/ProphetNet/tree/master/GLGE_baselines)

<sup>13</sup>[https://github.com/INK-USC/CommonGen/tree/master/evaluation/Traditional/eval\\_metrics](https://github.com/INK-USC/CommonGen/tree/master/evaluation/Traditional/eval_metrics)

<sup>14</sup>DINOISER has shown in their Figure 4 that their method is not better with a larger  $k$ .

Table 7: Training Parameter Settings. Batch Size = mini batch size  $\times N_{gc} \times$  GPU number, Optimized Steps = total steps /  $N_{gc}$ , and  $N_{gc}$  is gradient accumulation number.

| Dataset       | Lr & Schedule   | Batch Size              | Optimized Steps | Target Length |
|---------------|-----------------|-------------------------|-----------------|---------------|
| XSUM          | 8e-4 & Cosine   | $128 \times 3 \times 8$ | 80,000 / 3      | 50            |
| CNN/DAILYMAIL | 8e-4 & Cosine   | $80 \times 5 \times 8$  | 100,000 / 5     | 180           |
| IWSLT14 DE→EN | 2e-3 & Cosine   | $192 \times 2 \times 8$ | 160,000 / 2     | 90            |
| IWSLT14 EN→DE | 1.8e-3 & Cosine | $768 \times 1 \times 8$ | 60,000          | 90            |
| COMMONGEN     | 3e-4 & Constant | $384 \times 1 \times 8$ | 40,000          | 54            |

Table 8: SacreBLEU on the IWSLT14 test set. This result follows the setting of DiNOISER.

| Methods                                           | IWSLT14      |              |
|---------------------------------------------------|--------------|--------------|
|                                                   | DE→EN        | EN→DE        |
| Transformer (AR, beam = 5) [Vaswani et al., 2017] | 33.61        | 28.30        |
| CMLM (NAR, $k = 5$ ) [Ghazvininejad et al., 2019] | 29.41        | 24.34        |
| DiffusionLM ( $k = 50$ ) [Li et al., 2022a]       | 29.11        | 22.91        |
| DINOISER ( $k = 50$ ) [Ye et al., 2023]           | 31.61        | <u>26.14</u> |
| GENIE ( $k = 50$ ) [Lin et al., 2023]             | 29.45        | 23.89        |
| AR-DIFFUSION ( $k = 50$ )                         | <u>31.80</u> | 26.01        |
| AR-DIFFUSION ( $k = 500$ )                        | <b>32.35</b> | <b>26.51</b> |

## 446 D Impact of Minimum Bayes Risk and Anchor Point

447 **Minimum Bayes Risk** To investigate the relationship between the number of generated candidate  
448 samples ( $k$ ) and the quality of generation, we generate varying numbers of samples, ranging up to  
449 1,000, on the IWSLT14 De→En test set and present the results in Figure 4. The curve demonstrates  
450 an initial gain of approximately 0.5 SacreBLEU within the first 200 samples, after which the gain  
451 becomes insignificant with generating more samples.

452 **Anchor Point** We conduct experiments on AR-DIFFUSION using different anchor points  $(n_e, t_e)$ .  
453 These anchor points vary in terms of  $n_e$  values, namely  $1.0 \times N$ ,  $2.0 \times N$  and  $3.0 \times N$ , where  $N$   
454 denotes the target sentence length. Additionally, they share a common  $t_e$  value of  $T$ , which represents  
455 the total time step of diffusion. We present the results in Table 9, and determine that the best result is  
456 achieved at  $(n_e, t_e) = (2.0 \times N, T)$ .

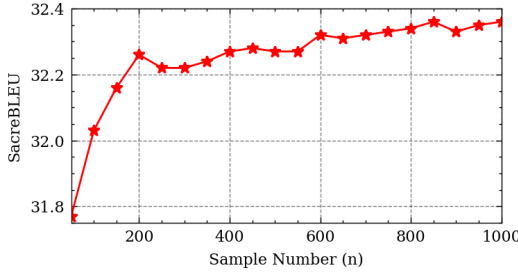

Figure 4: Relationship between the number of candidate samples for applying MBR and SacreBLEU on IWSLT14 DE→EN test set.

Table 9: Effect of anchor point at different positions on the IWSLT14 DE→EN test set. “ $N$ ” indicates the target sequence length and “ $T$ ” represents the total time step of diffusion.

| $n_e$          | $t_e$ | SacreBLEU    |
|----------------|-------|--------------|
| $1.0 \times N$ | $T$   | 31.23        |
| $2.0 \times N$ | $T$   | <b>31.80</b> |
| $3.0 \times N$ | $T$   | 31.58        |

## 457 E Proof of Inference with Skipping

458 During the inference process, skipping strategy requires the model  $g_\theta$  to infer the state  $z_{t_{i+1}}^{n_2}$  at a  
459 far-off timestep  $t_{i+1}$  compared to the current state  $z_{t_i}^{n_2}$ , where  $t_{i+1} \ll t_i$ . In our model, due to the

dynamic speed setting, token  $z_{t_{i+1}}^{n_1}$  with smaller timestep  $t_{i+1} \leq t_i$ , which is closer to  $t_{i+1}$ , and positions  $n_1 \leq n_2$  can provide stronger auxiliary information than  $z_{t_i}^{n_1}$ . This reduces the difficulty of inferring states for tokens in the end, making our multi-level diffusion model particularly suitable for accelerating the generation process.

Through maximizing the evidence lower bound (ELBO) of  $p(z_0)$ , the training object is equivalent to minimize the divergence between  $q(z_t|z_{t-1}, z_0)$  and  $p_\theta(z_{t-1}|z_t)$  following [Luo, 2022].

By converting the joint probability distribution into a conditional probability distribution, we obtain the following formula for  $q(z_{t_{i+1}}|z_{t_i}, z_0)$ .

$$\begin{aligned} q(z_{t_{i+1}}|z_{t_i}, z_0) &= q(z_{t_{i+1}}|z_{t_i-1}, z_{t_i}, z_0) q(z_{t_{i+1}-1}|z_{t_i}, z_0) \\ &= q(z_{t_{i+1}}|z_{t_i-1}, z_0) q(z_{t_{i+1}-1}|z_{t_i}, z_0) \\ &= q(z_{t_{i+1}}|z_{t_i-2}, z_0) q(z_{t_{i+1}-2}|z_{t_i-1}, z_0) q(z_{t_{i+1}-1}|z_{t_i}, z_0) \\ &= \prod_{k=1}^{t_i-t_{i+1}} q(z_{t_i-k}|z_{t_i-k+1}, z_0) \end{aligned} \quad (13)$$

Similarly, we reach the same conclusion regarding  $p_\theta(z_{t_{i+1}}|z_{t_i})$ .

Based on equation (13), which consists of  $q(z_t|z_{t-1}, z_0)$ , and the interchangeability between  $q(z_t|z_{t-1}, z_0)$  and  $p_\theta(z_{t-1}|z_t)$ , we can decompose  $q(z_{t_{i+1}}|z_{t_i}, z_0)$  by incorporating  $z_{t_i}$  and  $z_0$ , and utilize our estimated  $z_0$  to determine the expression of  $p_\theta(z_{t_{i+1}}|z_{t_i})$ .

$$q(z_{t_{i+1}} | z_{t_i}, z_0) = \prod_{n=1}^N q(z_{f(n, t_{i+1})}^n | z_{f(n, t_i)}^n, z_0^n) \quad (14)$$

Next, we obtain the explicit expression  $q(z_{f(n, t_{i+1})}^n | z_{f(n, t_i)}^n, z_0^n)$  through linear interpolation between  $z_{f(n, t_i)}^n$  and  $z_0^n$ .

$$\begin{aligned} q(z_{f(n, t_{i+1})}^n | z_{f(n, t_i)}^n, z_0^n) &= \frac{q(z_{f(n, t_i)}^n | z_{f(n, t_{i+1})}^n, z_0^n) q(z_{f(n, t_{i+1})}^n | z_0^n)}{q(z_{f(n, t_i)}^n | z_0^n)} \\ &= \frac{\mathcal{N}\left(z_{f(n, t_i)}^n; \sqrt{\frac{\bar{\alpha}_{f(n, t_i)}}{\bar{\alpha}_{f(n, t_{i+1})}}} z_{f(n, t_{i+1})}^n, \left(1 - \frac{\bar{\alpha}_{f(n, t_i)}}{\bar{\alpha}_{f(n, t_{i+1})}}\right) I\right) \mathcal{N}\left(z_{f(n, t_{i+1})}^n; \sqrt{\bar{\alpha}_{f(n, t_{i+1})}} z_0^n, (1 - \bar{\alpha}_{f(n, t_{i+1})}) I\right)}{\mathcal{N}\left(z_{f(n, t_i)}^n; \sqrt{\bar{\alpha}_{f(n, t_i)}} z_0^n, (1 - \bar{\alpha}_{f(n, t_i)}) I\right)} \\ &\propto \exp \left\{ -\frac{\left(z_{f(n, t_i)}^n - \sqrt{\frac{\bar{\alpha}_{f(n, t_i)}}{\bar{\alpha}_{f(n, t_{i+1})}}} z_{f(n, t_{i+1})}^n\right)^2}{2\left(1 - \frac{\bar{\alpha}_{f(n, t_i)}}{\bar{\alpha}_{f(n, t_{i+1})}}\right)} - \frac{\left(z_{f(n, t_{i+1})}^n - \sqrt{\bar{\alpha}_{f(n, t_{i+1})}} z_0^n\right)^2}{1 - \bar{\alpha}_{f(n, t_{i+1})}} \right. \\ &\quad \left. + \frac{\left(z_{f(n, t_i)}^n - \sqrt{\bar{\alpha}_{f(n, t_i)}} z_0^n\right)^2}{1 - \bar{\alpha}_{f(n, t_i)}} \right\} \\ &= \exp \left\{ -\frac{1 - \bar{\alpha}_{f(n, t_i)}}{2\left(1 - \frac{\bar{\alpha}_{f(n, t_i)}}{\bar{\alpha}_{f(n, t_{i+1})}}\right)(1 - \bar{\alpha}_{f(n, t_{i+1})})} \left[ z_{f(n, t_{i+1})}^n \right]^2 - 2 \left( \frac{\sqrt{\frac{\bar{\alpha}_{f(n, t_i)}}{\bar{\alpha}_{f(n, t_{i+1})}}} (1 - \bar{\alpha}_{f(n, t_{i+1})})}{1 - \bar{\alpha}_{f(n, t_i)}} z_{f(n, t_i)}^n \right. \right. \\ &\quad \left. \left. + \frac{\sqrt{\bar{\alpha}_{f(n, t_{i+1})}} (1 - \frac{\bar{\alpha}_{f(n, t_i)}}{\bar{\alpha}_{f(n, t_{i+1})}}) z_0^n}{1 - \bar{\alpha}_{f(n, t_i)}} z_{f(n, t_{i+1})}^n \right) \right\} \\ &\propto \mathcal{N}\left(z_{f(n, t_{i+1})}^n; \frac{\sqrt{\frac{\bar{\alpha}_{f(n, t_i)}}{\bar{\alpha}_{f(n, t_{i+1})}}} (1 - \bar{\alpha}_{f(n, t_{i+1})})}{1 - \bar{\alpha}_{f(n, t_i)}} z_{f(n, t_i)}^n + \frac{\sqrt{\bar{\alpha}_{f(n, t_{i+1})}} (1 - \frac{\bar{\alpha}_{f(n, t_i)}}{\bar{\alpha}_{f(n, t_{i+1})}}) z_0^n}{1 - \bar{\alpha}_{f(n, t_i)}}, \right. \\ &\quad \left. \frac{(1 - \frac{\bar{\alpha}_{f(n, t_i)}}{\bar{\alpha}_{f(n, t_{i+1})}})(1 - \bar{\alpha}_{f(n, t_{i+1})})}{1 - \bar{\alpha}_{f(n, t_i)}} I \right) \\ &= \mathcal{N}(z_{f(n, t_{i+1})}^n; \lambda z_{f(n, t_i)}^n + \mu z_0^n, \sigma I) \end{aligned} \quad (15)$$

where we have the following notations for simplification.

$$\lambda = \frac{\sqrt{\frac{\bar{\alpha}_{f(n,t_i)}}{\bar{\alpha}_{f(n,t_{i+1})}}}(1 - \bar{\alpha}_{f(n,t_{i+1})})}{1 - \bar{\alpha}_{f(n,t_i)}}, \mu = \frac{\sqrt{\bar{\alpha}_{f(n,t_{i+1})}}(1 - \frac{\bar{\alpha}_{f(n,t_i)}}{\bar{\alpha}_{f(n,t_{i+1})}})}{1 - \bar{\alpha}_{f(n,t_i)}}, \sigma = \frac{(1 - \alpha_{f(n,t_i)})(1 - \bar{\alpha}_{f(n,t_{i+1})})}{1 - \bar{\alpha}_{f(n,t_i)}}$$

Building upon equation (15), we substitute  $\mathbf{z}_0^n$  with  $\mathbf{g}_\theta(\mathbf{z}_{f(n,t)}^n, f(n, t); \mathbf{x})$ , yielding the final formula for  $p_\theta(\mathbf{z}_{f(n,t_{i+1})}^n | \mathbf{z}_{f(n,t_i)}^n; \mathbf{x})$  as the following equation.

$$p_\theta(\mathbf{z}_{f(n,t_{i+1})}^n | \mathbf{z}_{f(n,t_i)}^n; \mathbf{x}) \sim \mathcal{N}(\mathbf{z}_{f(n,t_{i+1})}^n; \lambda \mathbf{z}_{f(n,t_i)}^n + \mu \mathbf{g}_\theta(\mathbf{z}_{f(n,t)}^n, f(n, t); \mathbf{x}), \sigma \mathbf{I}) \quad (16)$$

## F Different Sampling Methods of BART

The sampling methods used by Lin et al. [2023] including Greedy Search, Beam Search Xiao et al. [2022], Diverse Beam Search(diversity strength = 0.8) Vijayakumar et al. [2016], Typical Sample ( $\tau = 1.2$ ) Meister et al. [2022], Top-k Sample ( $k = 50$ ) Fan et al. [2018] and Nucleus Sample ( $p = 0.92$ ) Holtzman et al. [2020].

Specifically, greedy search is to select the token with the highest probability at each step. Beam search is to select the largest token from among the beams with higher probability at each step. Diverse beam search is to divide the beams into multiple groups at each step and ensure the difference between groups by calculating the diversity score between groups. Typical sampling selects samples through a discrete random process. Top-k sampling is to randomly select one of the  $k$  candidate tokens with the highest probability at each step. Nucleus sampling is to randomly select one token at each step from the candidate tokens whose probability density is greater than  $p$ .

## G More Cases

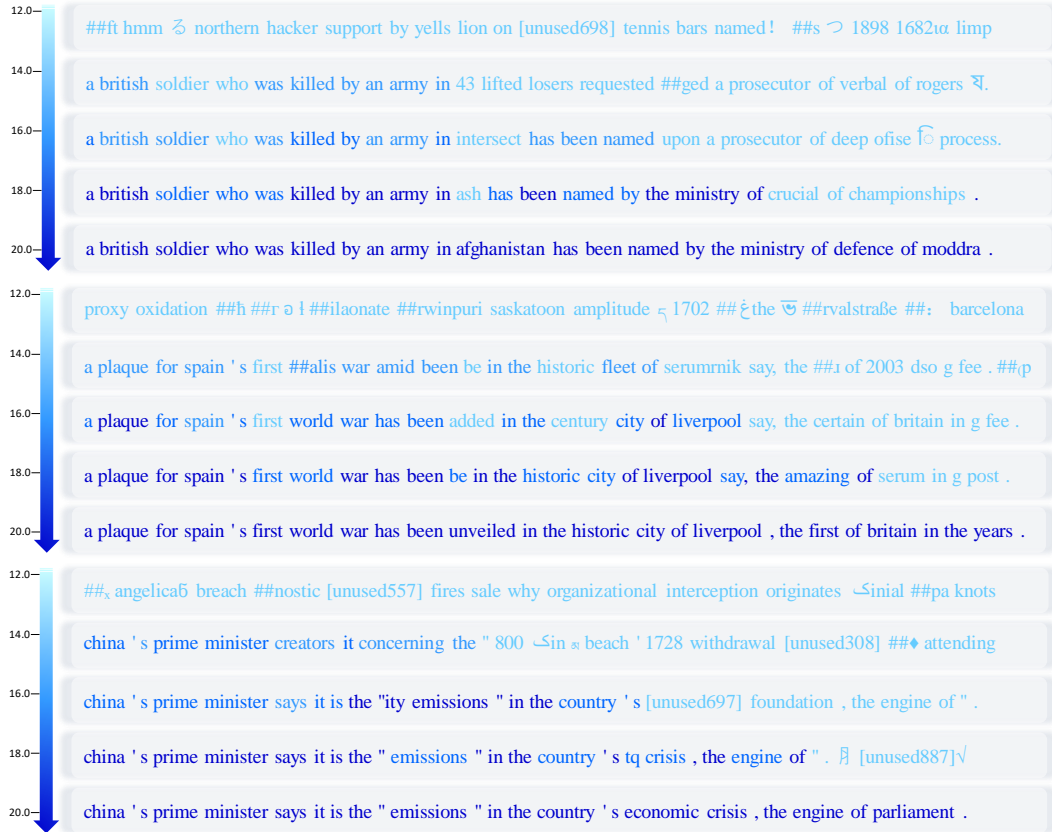

Supplement: Supplementary file 1 [file 7d866abba506e5a56335e4644ebe18f9-Supplemental-Conference.pdf]
